# Supplementary material for: Ecological succession of fungal and bacterial communities in Antarctic mosses affected by a fairy ring disease
Source: Research Square preprint supplement (doi:10.21203/rs.3.rs-393340/v1), 2021-04-14
Supplement: Supplementary file 1 [file 17d22d0804b0882d81d3e032.docx]

**Ecological succession of fungal and bacterial communities in Antarctic mosses affected by a fairy ring disease**

Luiz Henrique Rosa1*, Otávio Henrique Bezerra Pinto3, Lívia da Costa Coelho1, Peter Convey4, Micheline Carvalho-Silva2, Carlos Augusto Rosa1 and Paulo EAS Câmara2

1Departamento de Microbiologia, Instituto de Ciências Biológicas, Universidade Federal de Minas Gerais, Belo Horizonte, Minas Gerais, Brasil

2Departamento de Botânica, Universidade de Brasília, Brasília, Brasil

3Departamento de Biologia Celular, Universidade de Brasília, Brasília, Brasil

4British Antarctic Survey, NERC, High Cross, Madingley Road, Cambridge CB3 0ET, United Kingdom

*Corresponding author. Departamento de Microbiologia, Universidade Federal de Minas Gerais, Belo Horizonte, MG, CEP 31270-901. Tel.: +55-31-3409 2749; Fax: +55-31-3409 2730, Brazil. E-mail: lhrosa@icb.ufmg.br


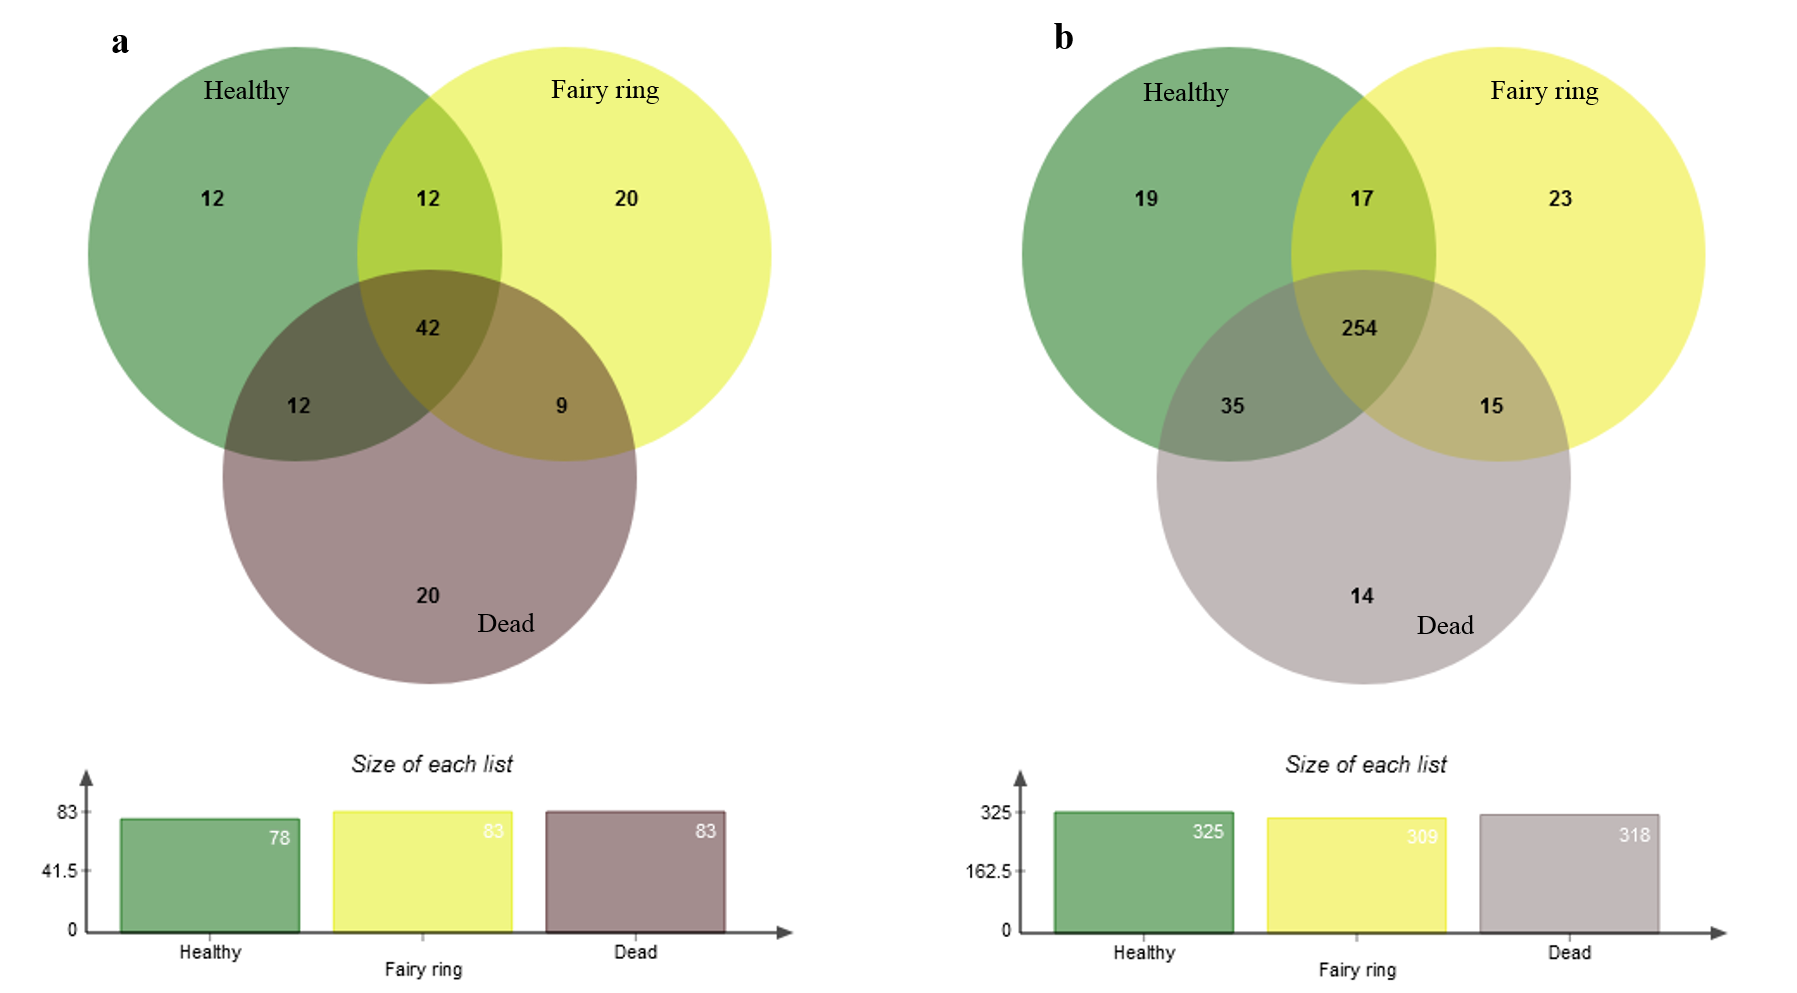


**Supplementary Figure 3**. Venn diagrams showing similarity among the (**a**) fungal and (**b**) bacterial assemblages of the healthy, infected and dead moss carpet samples analysed in this study.
