# Supplementary material for: Ecological succession of fungal and bacterial communities in Antarctic mosses affected by a fairy ring disease
Source: Research Square preprint supplement (doi:10.21203/rs.3.rs-393340/v1), 2021-04-14
Supplement: Supplementary file 2 [file 906044e8eb05714f0075a0e7.docx]

**Ecological succession of fungal and bacterial communities in Antarctic mosses affected by a fairy ring disease**

Luiz Henrique Rosa1*, Otávio Henrique Bezerra Pinto3, Lívia da Costa Coelho1, Peter Convey4, Micheline Carvalho-Silva2, Carlos Augusto Rosa1 and Paulo EAS Câmara2

1Departamento de Microbiologia, Instituto de Ciências Biológicas, Universidade Federal de Minas Gerais, Belo Horizonte, Minas Gerais, Brasil

2Departamento de Botânica, Universidade de Brasília, Brasília, Brasil

3Departamento de Biologia Celular, Universidade de Brasília, Brasília, Brasil

4British Antarctic Survey, NERC, High Cross, Madingley Road, Cambridge CB3 0ET, United Kingdom

*Corresponding author. Departamento de Microbiologia, Universidade Federal de Minas Gerais, Belo Horizonte, MG, CEP 31270-901. Tel.: +55-31-3409 2749; Fax: +55-31-3409 2730, Brazil. E-mail: lhrosa@icb.ufmg.br


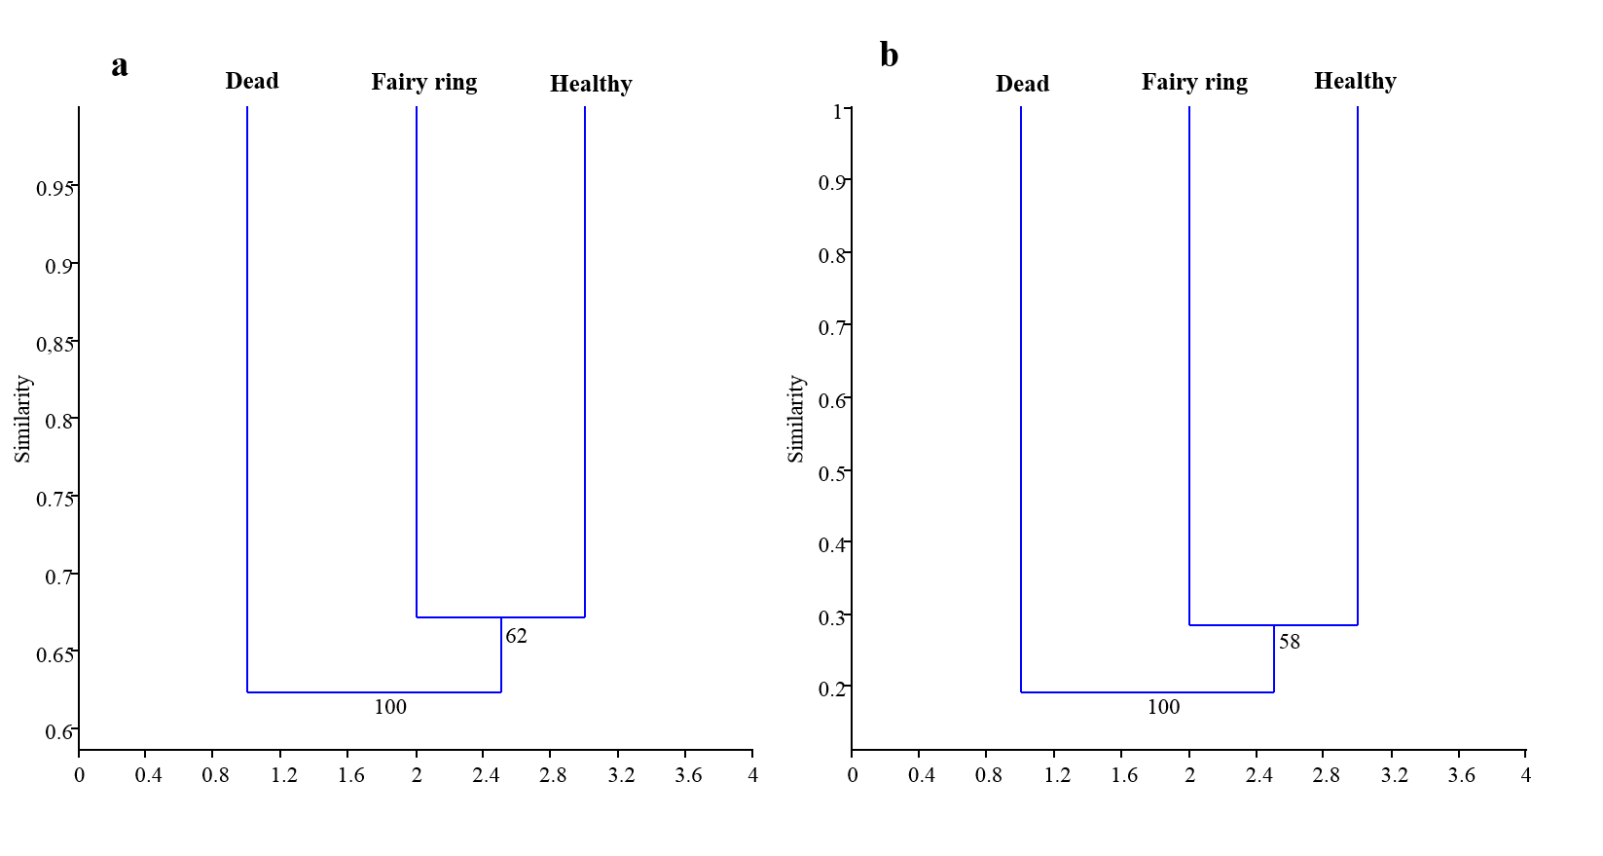


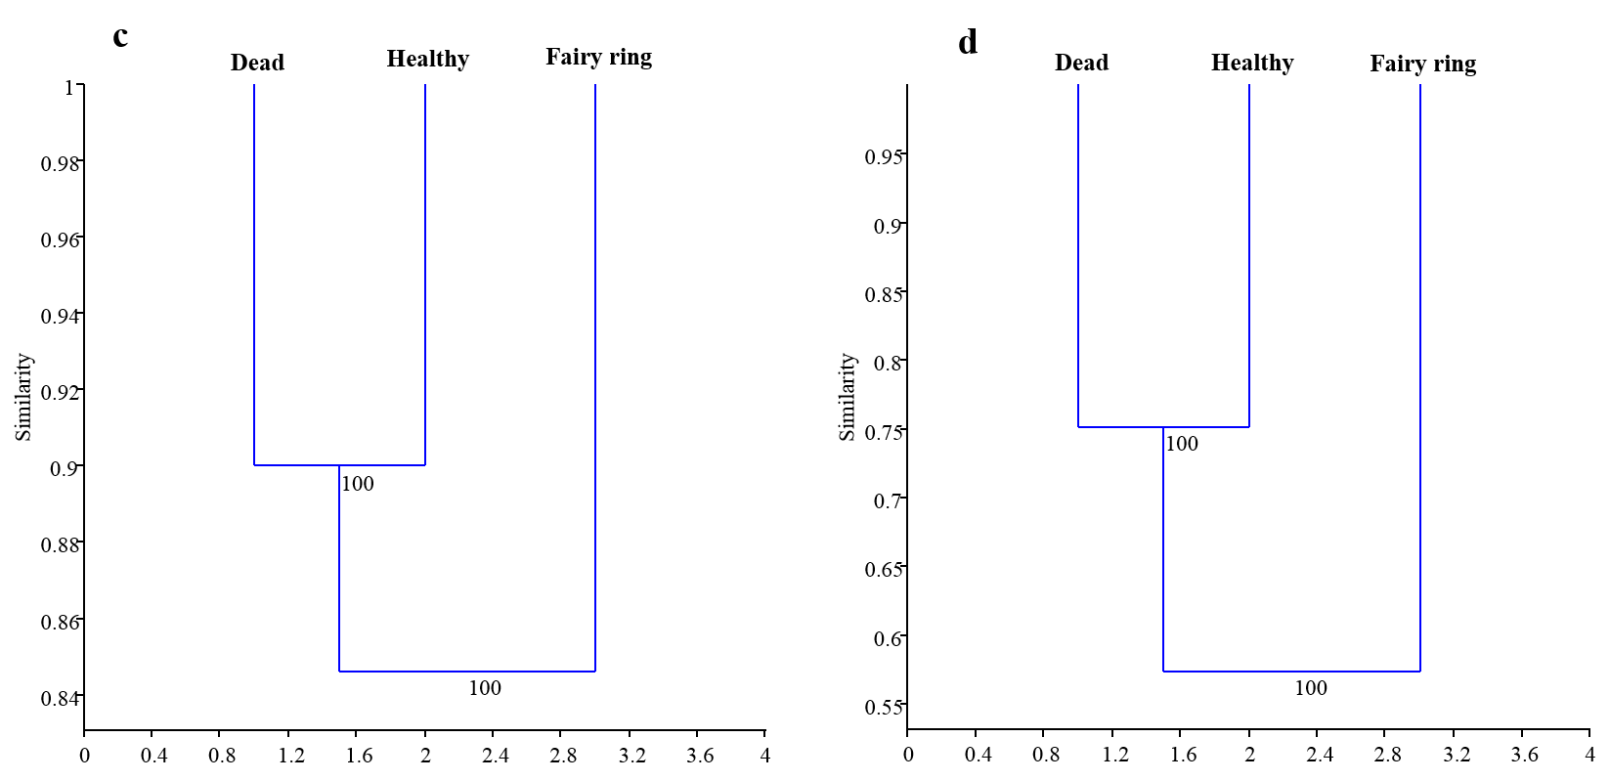


**Suppl. Figure 2**. Dendrogram showing the comparison of Sorensen and Bray-Curtis similarities beta diversity indices for the fungal and bacterial assemblages detected in the healthy, infected and dead moss carpet samples. Fungal (**a**) Sorensen and (**b**) Bray-Curtis similarities; bacterial (**c**) Sorensen and (**d**) Bray-Curtis similarities.
